# Supplementary material for: Role of interleukin-6 and interleukin-10 in morphological and functional changes of the blood–brain barrier in hypertriglyceridemia
Source: Springer Nature journal article supplement (doi:10.1186/s12987-023-00418-3), 2023-03-07
Supplement: MOESM1 [file 24601476]

## Additional file 1

### Role of interleukin-6 and interleukin-10 in morphological and functional changes of the blood-brain barrier in hypertriglyceridemia

Beáta Barabási, Lilla Barna, Ana Raquel Santa-Maria, András Harazin, Réka Molnár, András Kincses, Judit P. Vigh, Brigitta Dukay, Miklós Sántha, Melinda E. Tóth, Fruzsina R. Walter, Mária A. Deli, Zsófia Hoyk

**Figure S1**

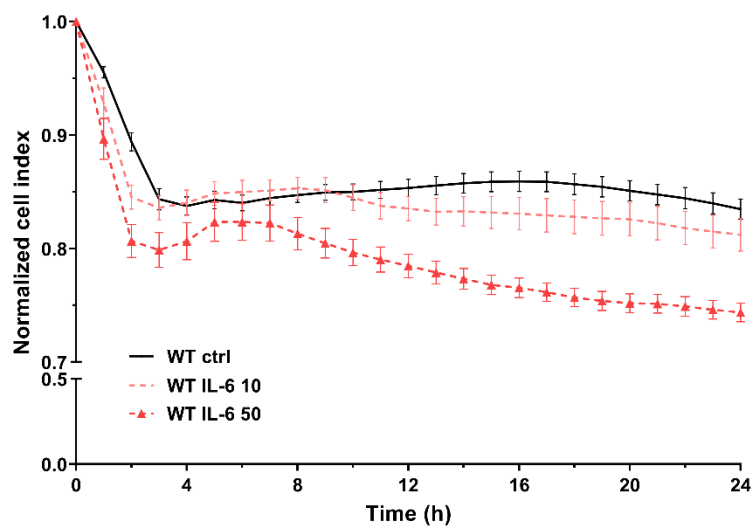

Concentration and time dependent effects of IL-6 on wild type primary mouse brain endothelial cell viability measured by impedance kinetics.

**Figure S2**

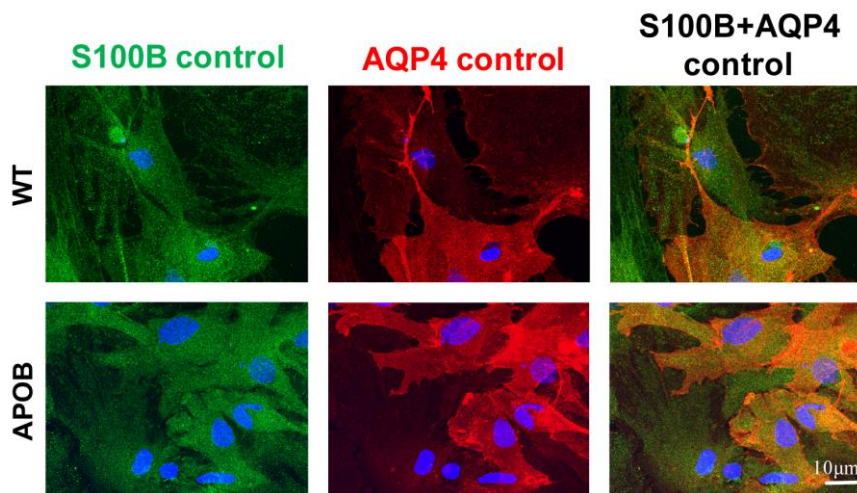

Immunostaining for astroglial cell markers S100B and aquaporin-4 (AQP4) in cultured glial cells. The cells were isolated from wild type (WT) and apolipoprotein B-100 (APOB-100) transgenic mice. AQP4 staining labels astroglial cells positive for S100B. Scale bar: 10 μm.

**Table S1.** Gene-specific primers for qPCR analysis

|   | gene         | forward primer            | reverse primer           |
|---|--------------|---------------------------|--------------------------|
| 1 | <i>Gapdh</i> | GGGTTCTATAAATACGGACTGC    | CCATTTTGTCTACGGGACGA     |
| 2 | <i>Actb</i>  | CTAAGGCCAACCGTGAAAAG      | ACCAGAGGCATACAGGGACA     |
| 5 | <i>Il6</i>   | GCTACCAAAGTGGATATAATCAGGA | CCAGGTAGCTATGGTACTCCAGAA |
| 6 | <i>Il10</i>  | CAGAGCCACATGCTCCTAGA      | TGTCCAGCTGGTCCCTTTGTT    |

**Table S2.** List of antibodies used in this study

A: Alexa Fluor

| Antibody name                                                                 | Vendor                 | Catalogue number | Host organism | Concentrations | Antibody registry ID        |
|-------------------------------------------------------------------------------|------------------------|------------------|---------------|----------------|-----------------------------|
| <b>Fluorescent immunostaining - Glia cultures (culture purity assessment)</b> |                        |                  |               |                |                             |
| anti-GFAP                                                                     | Sigma                  | G3893            | mouse         | 12.17 µg/ml    | <a href="#">AB_477010</a>   |
| anti-Iba1                                                                     | Abcam                  | ab5076           | goat          | 0.5 µg/ml      | <a href="#">AB_2224402</a>  |
| A488 anti-mouse                                                               | Invitrogen             | A21202           | donkey        | 1 µg/ml        | <a href="#">AB_141607</a>   |
| A488 anti-goat                                                                | Invitrogen             | A11055           | donkey        | 1 µg/ml        | <a href="#">AB_2534102</a>  |
| Dylight 549 anti-mouse                                                        | Jackson ImmunoResearch | 115-505-003      | goat          | 0.94 µg/ml     | -                           |
| <b>Fluorescent immunostaining - Cell cultures</b>                             |                        |                  |               |                |                             |
| anti-claudin                                                                  | Sigma                  | SAB4502981       | rabbit        | 0.625 µg/ml    | <a href="#">AB_10753223</a> |
| anti-occludin                                                                 | Invitrogen             | 71-1500          | rabbit        | 0.2 µg/ml      | <a href="#">AB_2533977</a>  |
| anti-ZO1                                                                      | Invitrogen             | 61-7300          | rabbit        | 0.25 µg/ml     | <a href="#">AB_2533938</a>  |
| anti-Pgp                                                                      | Calbiochem             | 517310           | mouse         | 0.4 µg/ml      | <a href="#">AB_564389</a>   |
| anti-Aqp4                                                                     | Merck                  | AB3594           | rabbit        | 0.4 µg/ml      | <a href="#">AB_91530</a>    |
| anti-Iba1                                                                     | Abcam                  | ab5076           | goat          | 0.5 µg/ml      | <a href="#">AB_2224402</a>  |
| anti-GFAP                                                                     | Sigma                  | G3893            | mouse         | 3.65 µg/ml     | <a href="#">AB_477010</a>   |
| anti-S100B                                                                    | Synaptic System        | 287011           | mouse         | 0.6 µg/ml      | <a href="#">AB_2814881</a>  |
| A594 anti-rabbit                                                              | Invitrogen             | A21207           | donkey        | 1 µg/ml        | <a href="#">AB_141637</a>   |
| A488 anti-mouse                                                               | Invitrogen             | A11029           | goat          | 1 µg/ml        | <a href="#">AB_2534088</a>  |
| Cy3-anti-rabbit                                                               | Sigma                  | C2306            | sheep         | 2.5 µg/ml      | <a href="#">AB_258792</a>   |
| A488 anti-goat                                                                | Invitrogen             | A11055           | donkey        | 1 µg/ml        | <a href="#">AB_2534102</a>  |
| DyLight 549 anti-mouse                                                        | Jackson ImmunoResearch | 115-505-003      | goat          | 0.94 µg/ml     | -                           |
